1 **Isoniazid preventive therapy adherence among HIV positive soldiers on antiretroviral**  
2 **therapy in Uganda.**

3 **Authors:**

4 **Sabila Moses, Ezekiel Mupere, Joanita Nangendo, Fred Semitala, Saul Chemonges,**  
5 **Patience Muwanguzi, Achilles Katamba.**

6 **Abstract:**

7 **Background:** Uganda has a heavy double burden of tuberculosis (TB) and currently ranks  
8 among the seven highest TB affected countries globally. World Health Organization (WHO)  
9 recommends isoniazid preventive therapy (IPT) for the treatment of latent TB. However, the  
10 adherence to IPT in military settings has not been well documented in Uganda.

11 **Methods:** We conducted a cross-sectional study among 300 HIV-positive clients on  
12 antiretroviral therapy (ART) at Bombo Military Hospital in Uganda. Clients were  
13 cumulatively recruited to a threshold sample. Data were entered and analysed using  
14 Epidata client v4.6.0.6 and Stata 14.0.

15 **Results:** Of the 300 clients the prevalence of IPT was 94.7% CI (92.1-97.2); adherence to  
16 IPT was associated with being: aged  $\geq 50$  years prevalence ratio (PR) of 1.061 and a  
17 confidence interval (CI) of 95% (1.01-1.12); married [ PR: 1.438, CI: 95% (1.12-1.84)];  
18 having social support [ PR: 1.498, CI: 95% (1.17-1.92)] and the role this played in IPT  
19 adherence among married participants [ PR: 0.817, CI: 95% (0.72-0.93)] are factors that  
20 were found to be significant.

21 **Conclusion:** There is need for Bombo medical facility in Uganda to emphasis on strategies  
22 to improve access, retention and adherence to ART and IPT for young adults. Secondly,  
23 advocating for social support and behavioural interventions have been identified as  
24 requirement for improving IPT adherence among HIV positive soldiers. There is need for

25 more research on the role that social support plays to reduce social stigma associated with  
26 HIV-positive patients. The findings for this Uganda study suggest that there is need to  
27 increase adherence to IPT for married participants living with HIV and this model could  
28 also be adopted in other resource constrained and low middle income countries.

## 29 **Background**

30 People living with (PWH) human immunodeficiency virus infection HIV(PWH) continues to  
31 grow worldwide [1]. Sub-Saharan Africa (SSA) accounts for 71% of the global burden of HIV  
32 infections [2].

33 The high disease burden of HIV and tuberculosis (HIV/TB) co-infection, accounts for 95% of  
34 global TB infections [3].

35 Antiretroviral therapy (ART) has been documented to dramatically lower the chances of  
36 developing TB [4]. However, people with HIV still have a considerable risk of acquiring TB [5].  
37 Combined therapies of isoniazid preventative therapy (IPT) and ART is known to reduce the  
38 burden of TB in PWH [6]. However, there is a perception that people identified in this defined  
39 cohort may be challenged with adhering to both the treatment regimens for several reasons  
40 including long duration of therapy, high pill burden and drug reaction [7].

41 The stipulated Ministry of Health (MOH) of Uganda guidelines on HIV management  
42 recommends IPT prophylaxis for HIV positive children and adults who do not have TB for six  
43 months [8].

44 A cross-sectional study in South Africa [9] found self-reported adherence to have an IPT of 72%,  
45 and randomized control trial of IPT adherence among HIV clients reported adherence of 88% in  
46 Uganda [10] Financial implications, inconveniences collecting medications, long queues, drug

47 stock outs, pill burden, adverse side effects and lack of service integration have been shown to  
48 interrupt clients from sticking to (IPT) [7].

49 While extensive information is available on IPT adherence and factors associated in high burden,  
50 little is known about it in the military settings in Uganda. We aimed to conduct this study at  
51 Bombo General military hospital.

## 52 **Methods**

### 53 **Study design and setting**

54 A cross-sectional study of 300 HIV-positive clients on antiretroviral therapy (ART) at  
55 Bombo Military Hospital in Uganda was conducted.

56 The hospital has a capacity of 150 beds, serving over 15,000 in-patients annually and runs a full  
57 time TB/HIV clinic, which currently serves over 5082 HIV positive soldiers and over 4000  
58 soldiers on IPT. Data on HIV and TB adherence at the facility is routinely captured in the central  
59 facility-operated data-base whenever a client visits the clinic.

60 Bombo Hospital has been serving as a referral Centre for various health units within the Uganda  
61 Peoples Defence Forces (UPDF) and the surrounding civilian communities since September  
62 2012, also collaborates with the Makerere University Walter Reed Project to improve laboratory  
63 services in Uganda.

64

65

66

67

68 **Study population.**

69 Uganda government soldiers living with HIV/AIDS who were on ART and still on IPT treatment  
70 at BMH TB/HIV clinics between February and September 2022 were the study population. The  
71 inclusion criteria for participants in this study were clients who gave their informed consent,  
72 stayed within the military barracks were still on IPT.

73 **Sampling and sample size estimation.**

74 A consecutive sampling approach was used to enrol participants based on Kish Leslie formulae  
75 and assumed a z- score at 95%, CI=1.96, adherence 84% [11]. Using the margin of error of 5%  
76 and adjusted for 10% of non-response to estimate a sample of 182. For the factors associated  
77 with IPT adherence, we used the formula for two proportions to calculate the sample size, a  
78 standard normal value corresponding to 80% power of study male proportion of 50% and female  
79 proportion 50% in the study respectively was adopted. The proportion female and male clients  
80 who adhered to IPT at 88%. The calculated sample size was 472, however, only 300 clients were  
81 interviewed during the study due to transfers to various stations which reduced the number of  
82 available clients.

83 **Data collection/study procedures**

84 A structured questionnaire was utilised to collect self-reported information from enrolled  
85 participants. The questionnaires were translated into Kiswahili and pretested 10 randomly  
86 selected clients. The data were collected by registered nurses trained on the study procedures and  
87 experienced in TB/HIV treatment services. The outcome variable was adherence to IPT defined  
88 as taking 95% of prescribed isoniazid (INH) doses in the last 28 days prior to the study (MOH,  
89 2020). The independent variables included, deployments, counselling on adherence, follow up

90 calls, fear of INH side effects, and knowledge of IPT, IPT pill burden, decision to take INH,  
91 social support, age, sex, marital status and education level. All data were checked for consistency  
92 and completeness, the necessary corrections were made, and it was double entered in Epidata  
93 v4.6.0.6

#### 94 **Data analysis**

95 All data were exported to Stata 14.0 version for analysis and summarised using descriptive  
96 statistics. The association between dependent and independent variables was evaluated using  
97 modified Poisson regression analysis model with robust standard errors. Variables with a  $p < 0.2$   
98 at bivariate analysis were considered for the multivariate model and variables with a  $p < 0.05$   
99 were considered significantly associated with the outcome variable and were expressed as  
100 prevalence ratio (PR) and 95% confidence interval.

#### 101 **Ethical considerations**

102 This study was approved by the School of Medicine Research and Ethics committee  
103 (SOMREC), Number 2022- 401. All participants gave informed consent to participant in  
104 the study.

#### 105 **Results**

106 **Participant demographics.** The mean age of enrolled participants was 41.33( $\pm$ SD 10.72)  
107 of whom 61.7% were male and 72.7% married (Table 1).

108 **Individual beliefs.** Most participants (74.3%) did not fear side effects of isoniazid (INH),  
109 were knowledgeable about the IPT therapy (81.3%), and didn't fear the pill burden  
110 (77.7%).

111 **Family and social factors.** Most of the participants (85.3%) had not been deployed or  
112 assigned tasks in a different station during their period of treatment. A significant  
113 proportion of participants (62.7%) reported to have no social support and had the decision  
114 made by the family to starting with INH (35.7%), followed by the decision by the doctor  
115 (25.3%).

116 **Table 1: Demographic characteristics of the study of 300 soldiers on IPT at Bombo**  
117 **Military Hospital.**

| Characteristics                | Number<br>Percentage |
|--------------------------------|----------------------|
| <b>Age in years</b>            |                      |
| <b>18-39</b>                   | 139 (46.3)           |
| <b>40-49</b>                   | 83 (27.8)            |
| <b>50 above</b>                | 78 (26.0)            |
| <b>Sex of the participants</b> |                      |
| <b>Male</b>                    | 185 (61.7)           |
| <b>Female</b>                  | 115 (38.3)           |
| <b>Marital status</b>          |                      |
| <b>Married</b>                 | 218 (72.7)           |
| <b>Not married</b>             | 82 (27.3)            |
| <b>Education level</b>         |                      |
| <b>Never</b>                   | 25 (8.3)             |
| <b>Primary</b>                 | 126 (42.0)           |
| <b>Secondary</b>               | 110 (36.7)           |
| <b>Tertiary</b>                | 39 (13.0)            |

118  
119 **Relationship of health workers with the clients related factors.** The majority of the  
120 participating subjects reported follow up calls by the care givers (71.0%) and received  
121 counselling on adherence to IPT (86.7%).

122 **Prevalence of adherence and factors associated to IPT.** Prevalence of self-reported  
123 adherence to IPT was 94.7%; 95% CI (92.1- 97.2). Variables taken to multivariate analysis  
124 with a  $p < 0.2$ , included social support ( $p=0.015$ ), dummy variable secondary

125 education( $p=0.186$ ), Age 50 years and above ( $p=0.036$ ), marital status ( $p=0.017$ ), fear of  
 126 INH side effects ( $p=0.161$ ) and sex of the participants. The factors that were independently  
 127 associated with adherence to IPT in the last 28 days, included were: 50 years and above  
 128 (PR= 1.061,  $P:0.030$ ), marital status (PR=1.438,  $p= 0.004$ ), social support (PR=1.495,  
 129  $p=0.001$ ) and an interaction factor between social support and marital status (PR=0.817,  
 130  $p= 0.002$ ). Fear for INH side effects, education and sex of the participants were not  
 131 statistically significant at multivariate analysis however they were significant at bivariate  
 132 analysis.

133

134 **Table 2: Individual personal beliefs, family and social factors of the study**  
 135 **participants of 300 soldiers on IPT at Bombo Military Hospital.**

| Characteristics                 | Summary statistics<br>n (Percentage) |
|---------------------------------|--------------------------------------|
| <b>Fear of INH side effects</b> |                                      |
| Yes                             | 77 (25.7)                            |
| No                              | 223 (74.3)                           |
| <b>Knowledge on IPT</b>         |                                      |
| Yes                             | 244 (81.3)                           |
| No                              | 56(18.7)                             |
| <b>Fear of IPT pill burden</b>  |                                      |
| Yes                             | 67(22.3)                             |
| No                              | 233 (77.7)                           |
| <b>Social support</b>           |                                      |
| Yes                             | 112(37.3)                            |
| No                              | 188(62.7)                            |
| <b>Decision to take INH</b>     |                                      |
| Doctor                          | 76(25.3)                             |
| Patient                         | 74(24.7)                             |
| Family                          | 107(35.7)                            |
| Friends                         | 43(14.3)                             |

136  
137  
138  
139  
140  
141  
142

**Table 3: Multivariate analysis of factors associated with IPT adherence among the 300 participants on ART at Bombo Military Hospital.**

| <b>Factors</b>                | <b>PR</b>    | <b>95% CI</b>     | <b>P-Value</b> |
|-------------------------------|--------------|-------------------|----------------|
| Age in years                  |              |                   |                |
| 18-39                         | <b>Ref</b>   | <b>Ref</b>        |                |
| 40-49                         | <b>0.981</b> | <b>0.91- 1.06</b> | 0.613          |
| 50+                           | <b>1.061</b> | <b>1.01-1.12</b>  | <b>0.030</b>   |
| Social support                |              |                   |                |
| No                            | <b>Ref</b>   | <b>Ref</b>        |                |
| Yes                           | <b>1.498</b> | <b>1.17-1.92</b>  | <b>0.001</b>   |
| Marital status                |              |                   |                |
| No                            | <b>Ref</b>   | <b>Ref</b>        |                |
| Yes                           | <b>1.438</b> | <b>1.12-1.84</b>  | <b>0.004</b>   |
| Social support*Marital status | <b>0.817</b> | <b>0.72- 0.93</b> | <b>0.002</b>   |

143  
144

**Discussion**

145 **Prevalence of IPT adherence.** In this study, it was found that 94.7% of the study  
146 participants had taken at least  $\geq 95\%$  of the prescribed isoniazid doses in the last 28 days  
147 prior to the study. The study conducted in Ethiopia, the adherence to IPT was 86.5%. This  
148 variation could be explained by the difference in the assessment of adherence. In Ethiopia,  
149 the adherence was assessed in the last 7 days, and they used random sampling opposed to



150 consecutive sampling method which is prone to random sampling errors used in this study.  
151 This deviation could also be attributed to the way the policies of IPT uptake are enforced  
152 and implemented in the military settings compared to the civilian settings. A cross-  
153 sectional study carried out in Uganda in Butembo District on IPT found, the adherence at  
154 84% [8]. This variation in adherence to IPT could be attributed to the difference in the  
155 cross-sectional study used in this study which is likely being affected by desirability and  
156 recall bias compared to a retrospective study. The high prevalence in this study could be  
157 explained by the following reasons: The military are good at streamlining policies and  
158 because of the discipline instilled in soldiers to obey orders, this could have facilitated the  
159 smooth implementation of IPT uptake among the soldiers. Furthermore, the use of  
160 counselling prior to medication and the information about IPT and great emphasis given to TB-  
161 HIV collaborative activity by the government, military medical leadership and implementing  
162 partners like URC. This could also be explained by enough manpower of health workers  
163 available to offer HIV services.

164 **Factors associated with adherence to IPT.** In the multivariate analysis soldiers of age  
165 category 50+ years old were more likely to adhere to IPT. Soldiers aged 50 years and above  
166 (PR=1.061, p=0.005), were significantly associated with adherence of IPT in the last 28  
167 days of assessment. This implied that soldiers aged 50 years and above were 1.061 times  
168 likely to adhere to IPT treatment compared to the young adults. This finding is in  
169 agreement with a study done in Tanzania which found out that soldiers aged 50 years and  
170 above were associated with IPT adherence [12], which corresponded to the current study  
171 with a tune of 98.5% (p=0.011).

172 It can be asserted that the elderly patients are more likely to take counselling services and  
173 advice from the health workers very serious compared to the younger adults. Additionally,  
174 in the military as a soldier approaches retirement, a soldier is assigned light duties, which  
175 gives them ample time to be with their families and adopt health-seeking behaviours. On  
176 the other hand, the poor adherence to IPT among the young adults could be due to the fact  
177 that the youthful soldiers are assigned several heavy duties both day and night in the  
178 military design. These duties are so engaging and this may hinder the soldiers from seeking  
179 medical care on time and have limited time to socialize and engage with their families.  
180 Soldiers work under orders and every activity that they undertake requires permission or a  
181 movement order which kind of policy may play a considerable big role in jeopardizing the  
182 treatment schedule of IPT. This is worse especially with the junior soldiers in the hierarchy  
183 of the army coupled with their immediate instructors who may not understand the  
184 negative impact of not taking the medicine on time and in regular basis.

185 The present study further revealed that having social support (PR= 1.494,  $p= 0.001$ ) was  
186 independently associated with adherence to INH. This implies that having social support  
187 increases the likelihood adherence of IPT.

188 This finding of the social support is consistent with the report from a study by Munseri and  
189 colleagues [13], who reported significant influence that family and other support systems  
190 play in adherence to IPT. In their study, Munseri and colleagues further measured how  
191 likely it was for completers to have a friend or family member with TB. The finishers were  
192 also 97% more likely to have family and spouse approval for the decision to take IPT  
193 according to the study.

194 This finding of social support is also in agreement with reports from a study that revealed  
195 that patients rely on the support of their relatives and friends and are embarrassed to ask  
196 their jobs for permission to attend their TB treatment due to stigma [14]. This is true since,  
197 in the bivariate analysis, more of the participants in this study who stuck to IPT reported  
198 receiving support from family and spouses (97.2%) than from doctors in their decision to  
199 take IPT.

200 The present study further revealed that being married was significantly associated with  
201 adherence (PR= 1.438,  $p= 0.004$ ). This implies that having a partner or spouse increases  
202 the likelihood of adherence by 43.8%. This finding is consistent with a study done in South  
203 Africa in 14 public primary care clinics in Matlosana which reported 79% of the  
204 participants had a partner or a spouse as a motivator to adhere to preventive therapies  
205 compared to 21% who had no spouse [15]. This study is also in agreement with a study  
206 conducted in another part of Uganda that reported IPT uptake to be highest among married  
207 people [8], probably due to social support from the couples and the family at large to seek  
208 for IPT services at the health facility.

209 The study also revealed that the interaction between social support and marital status  
210 (PR= 0.817,  $p= 0.003$ ) was associated with the adherence to IPT. This implies that  
211 additional 81.7 % of the married participants living with HIV received social support which  
212 facilitated their adherence to IPT treatment. No literature however talks about the role of  
213 social support for improved adherence to IPT among the married people living with HIV.  
214 Understanding the available social support for marrieds living with HIV reveals the  
215 important people within their social network that could be pivotal to improve their

216 retention in care and adherence to medications and direct links between disclosure and  
217 support within families and broader community.

218 The role of social support among the married clients could be attributed to the fact that  
219 social support from the family takes all forms especially emotional support. Married  
220 soldiers living with HIV could have received advice and courage to adhere to their  
221 treatment through their families.

222 Fear for INH side effects, education and sex of the participants were not statistically  
223 significant at multivariate analysis however they were significant at bivariate analysis,  
224 which is in agreement with a study done by Munseri and colleagues which reported non-  
225 completers were more likely to cite fear of INH side effects at 14% [13].

226 The non-significance of the variables could be due to the small sample size, the difference in  
227 the study population, study settings, study design, sampling procedure, and difference in  
228 question comprehension.

229 Level of education was not significant at multivariate analysis which is not in agreement  
230 with a randomized control trial conducted in Botswana among adults which found that educated  
231 were more likely to adhere to IPT [16]. This variation could be explained by the difference in the  
232 randomized trial study design used in Botswana in contrast to cross sectional design in this study.

233 The gender of the participants in this study were not significant at multivariate analysis, this  
234 study differs from an Institutional-based cross sectional study conducted in 2019 in Tigari, North  
235 Ethiopia among 372 HIV positive adults, which claimed being a man was significantly  
236 associated with IPT adherence [17]. This deviation could be explained by the big sample size  
237 used in Ethiopian study as compared to the present study. The deviation could also be explained  
238 by the study population, in this study we looked at only soldiers compared to the study done in  
239 Ethiopia which looked at the general adult population.

240 **Limitations of the study.** One limitation of this study is that adherence to IPT was  
241 measured by self-reporting. This approach is subjected to recall and social desirability  
242 biases. Secondly, a relatively small number of participants were recruited. However, the  
243 results reported herein, provide valuable insights into factors influencing adherence to IPT  
244 and highlight the value of further research in this area and HIV related factors that were  
245 not studied.

246 **Strength of the study.** Considering that there are limited studies in this area in Uganda,  
247 the results of this study could be used as a baseline to draft program implementations to  
248 improve access, and adherence to IPT.

249 **Conclusion.** The adherence of Isoniazid Preventive Therapy was high. The factors that  
250 were predicted to be associated with the adherence to IPT among the HIV positive soldiers  
251 on ART included, the elderly, being married, having social support and the role social  
252 support plays in the adherence of IPT among the married participants.

253 **Recommendations.** The Ministry of Health could put more emphasis on strategies to  
254 improving access, retention and adherence to ART and IPT for young adult persons in

255 Uganda. It is proposed that the army leadership can advocate for social support and  
256 behavioural interventions for improving IPT adherence among HIV positive young soldiers  
257 and the MOH should carry more research to study the role social support, plays to reduce  
258 stigma and increase adherence to IPT treatment for the married participants living with  
259 HIV in resource constrained and low middle income countries.

260 **Conflict of interest.** The authors declare that there is no conflict of interest regarding the  
261 publication of this article.

262 **Authors contribution.** Sabila Moses initiated the study, performed the overall design,  
263 execution of the study, data collection and statistical analysis. Achilles Katamba and Ezekiel  
264 Mupeere supervised the study. Kalyango Joan participated in guidance throughout the  
265 project. Saul Chemonges, Patience Muwanguzi, Nangondo Joan, Fred Semitala participated  
266 in critical revision of the paper. All authors read and approved the final paper for  
267 submission.

268 **Acknowledgement.** The authors acknowledge the data collectors, study participants,  
269 clinical epidemiology unit, Makerere university implementation science research and the  
270 administration of army leadership especially the chief of medical services-UPDF and the  
271 Director General Military Hospital, Bombo for permitting them to undertake the study.  
272 They also extend their gratitude to school of medicine research ethics committee for  
273 approving the study and Implementation science research for the financial support of the  
274 project.

275 **Funding.** Research reported in this publication was supported by the Fogarty International  
276 Centre, National Institute on Mental Health of the National Institutes of Health under

277 Award Number D43TWO10037. The content is solely the responsibility of the authors and  
278 does not necessarily represent the official views of the National Institute of Health.

279

## 280 References

281

- 282 1. Govender NP, Todd J, Nel J, Mer M, Karstaedt A, Cohen C: **HIV Infection as Risk Factor for Death**  
283 **among Hospitalized Persons with Candidemia, South Africa, 2012-2017.** *Emerg Infect Dis* 2021,  
284 **27:1607-1615.**
- 285 2. Govindasamy D, Seeley J, Olaru ID, Wiyeh A, Mathews C, Ferrari G: **Informing the measurement**  
286 **of wellbeing among young people living with HIV in sub-Saharan Africa for policy evaluations:**  
287 **a mixed-methods systematic review.** *Health Qual Life Outcomes* 2020, **18:120-120.**
- 288 3. Adrawa N, Alege JB, Izudi J: **Alcohol consumption increases non-adherence to ART among**  
289 **people living with HIV enrolled to the community-based care model in rural northern Uganda.**  
290 *PLoS One* 2020, **15:e0242801-e0242801.**
- 291 4. Yanes-Lane M, Ortiz-Brizuela E, Campbell JR, Benedetti A, Churchyard G, Oxlade O, Menzies D:  
292 **Tuberculosis preventive therapy for people living with HIV: A systematic review and network**  
293 **meta-analysis.** *PLoS Med* 2021, **18:e1003738-e1003738.**
- 294 5. Smith R, Villanueva G, Probyn K, Sguassero Y, Ford N, Orrell C, Cohen K, Chaplin M, Leeflang  
295 MM, Hine P: **Accuracy of measures for antiretroviral adherence in people living with HIV.**  
296 *Cochrane Database Syst Rev* 2022, **7:Cd013080.**
- 297 6. Maokola W, Ngowi B, Lawson L, Robert M, Mahande M, Todd J, Msuya S: **Coverage of isoniazid**  
298 **preventive therapy among people living with HIV; A retrospective cohort study in Tanzania**  
299 **(2012-2016).** *Int J Infect Dis* 2021, **103:562-567.**
- 300 7. Makanjuola T, Taddese HB, Booth A: **Factors associated with adherence to treatment with**  
301 **isoniazid for the prevention of tuberculosis amongst people living with HIV/AIDS: a systematic**  
302 **review of qualitative data.** *PLoS One* 2014, **9:e87166.**
- 303 8. Oonyu L, Kang S, Konlan KD, Kang YA: **Isoniazid Preventive Therapy for Tuberculosis in People**  
304 **Living with HIV: A Cross Sectional Study in Butebo, Uganda.** *Infect Chemother* 2022, **54:70-79.**
- 305 9. Szakacs TA, Wilson D, Cameron DW, Clark M, Kocheleff P, Muller FJ, McCarthy AE: **Adherence**  
306 **with isoniazid for prevention of tuberculosis among HIV-infected adults in South Africa.** *BMC*  
307 *infectious diseases* 2006, **6:1-7.**

- 308 10. Wilkinson D, Squire S, Garner P: **Effect of preventive treatment for tuberculosis in adults**  
309 **infected with HIV: systematic review of randomised placebo controlled trials.** *Bmj* 1998,  
310 **317:625-629.**
- 311 11. Mindachew M, Deribew A, Tessema F, Biadgilign S: **Predictors of adherence to isoniazid**  
312 **preventive therapy among HIV positive adults in Addis Ababa, Ethiopia.** *BMC Public Health*  
313 2011, **11:916.**
- 314 12. Shayo GA, Moshiro C, Aboud S, Bakari M, Mugusi FM: **Acceptability and adherence to Isoniazid**  
315 **preventive therapy in HIV-infected patients clinically screened for latent tuberculosis in Dar es**  
316 **Salaam, Tanzania.** *BMC Infect Dis* 2015, **15:368.**
- 317 13. Munseri PJ, Talbot EA, Mtei L, Fordham von Reyn C: **Completion of isoniazid preventive therapy**  
318 **among HIV-infected patients in Tanzania.** *Int J Tuberc Lung Dis* 2008, **12:1037-1041.**
- 319 14. Gust DA, Mosimaneotsile B, Mathebula U, Chingapane B, Gaul Z, Pals SL, Samandari T: **Risk**  
320 **factors for non-adherence and loss to follow-up in a three-year clinical trial in Botswana.** *PLoS*  
321 *One* 2011, **6:e18435.**
- 322 15. Bezabhe WM, Chalmers L, Bereznicki LR, Peterson GM, Bimirew MA, Kassie DM: **Barriers and**  
323 **facilitators of adherence to antiretroviral drug therapy and retention in care among adult HIV-**  
324 **positive patients: a qualitative study from Ethiopia.** *PLoS One* 2014, **9:e97353.**
- 325 16. Cohen MS, Chen YQ, McCauley M, Gamble T, Hosseinipour MC, Kumarasamy N, Hakim JG,  
326 Kumwenda J, Grinsztejn B, Pilotto JH, et al: **Prevention of HIV-1 infection with early**  
327 **antiretroviral therapy.** *N Engl J Med* 2011, **365:493-505.**
- 328 17. Legese H, Degefa H, Gebrewahd A, Gebremedhin H: **Utilization of isoniazid prophylaxis therapy**  
329 **and its associated factors among HIV positive clients taking antiretroviral therapy at Fre**  
330 **Semaetat primary hospital, Hawzien districts, Tigray, Northern Ethiopia.** *Trop Dis Travel Med*  
331 *Vaccines* 2020, **6:11.**

332
